# Supplementary material for: Nuclear lamina dysfunction triggers a germline stem cell checkpoint
Source: PubMed Central journal article supplement (PMC6160405; doi:10.1038/s41467-018-06277-z), 2018-09-27
Supplement: 41467_2018_6277_MOESM1_ESM.pdf [file 41467_2018_6277_MOESM1_ESM.pdf]

**Nuclear lamina dysfunction  
triggers a germline stem cell checkpoint**

**Barton *et al.***

## Supplementary Figure 1

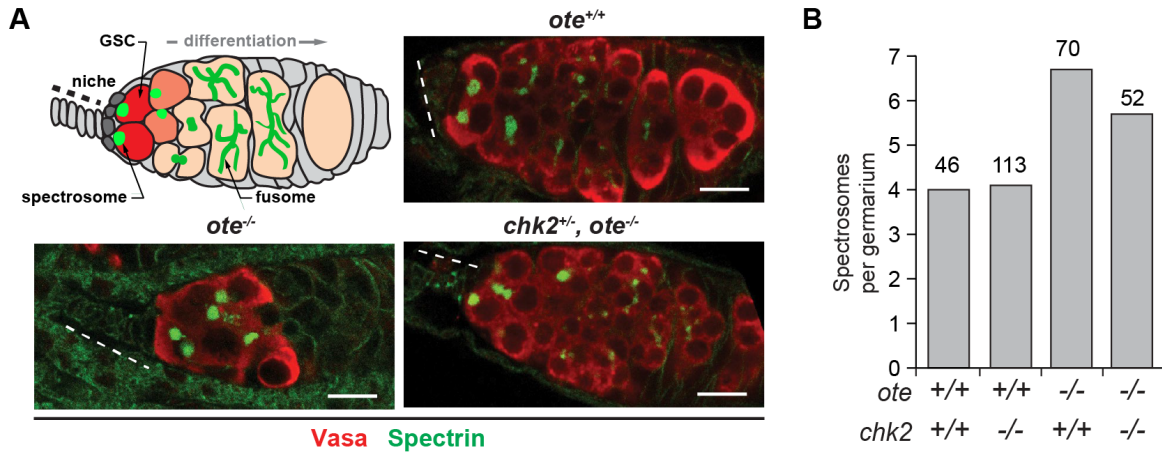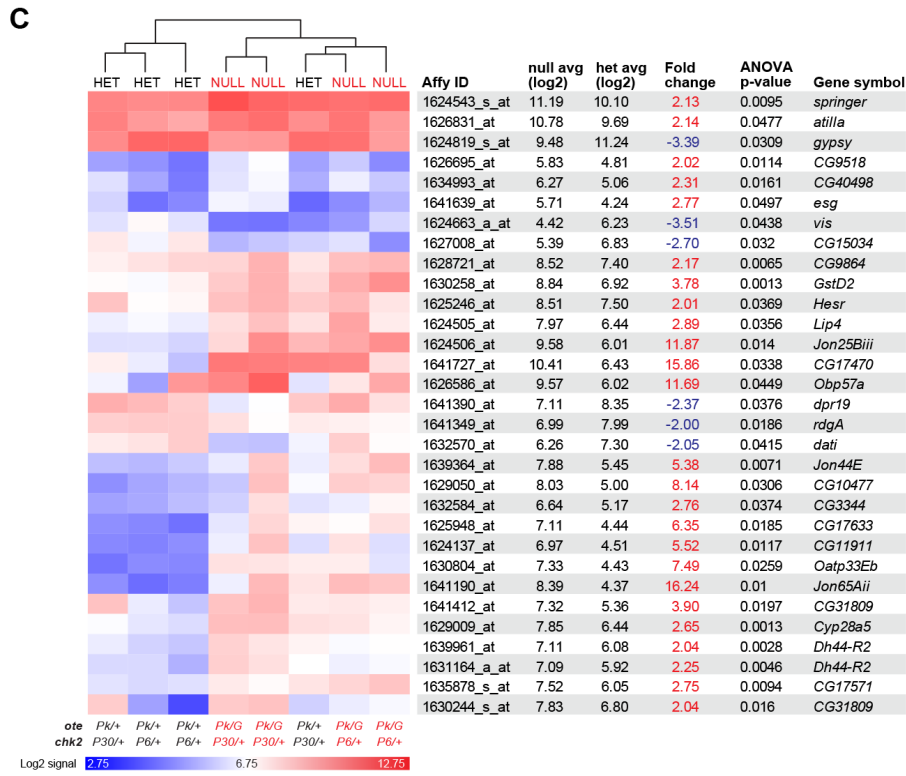

**D**

| GO molecular function                                            | REFLIST (13757) | Ote UP (23) | expected | enrichment | FDR      |
|------------------------------------------------------------------|-----------------|-------------|----------|------------|----------|
| serine-type peptidase activity (GO:0008236)                      | 253             | 7           | 0.42     | 16.55      | 4.08E-04 |
| serine hydrolase activity (GO:0017171)                           | 254             | 7           | 0.42     | 16.48      | 2.09E-04 |
| serine-type endopeptidase activity (GO:0004252)                  | 231             | 6           | 0.39     | 15.54      | 1.05E-03 |
| endopeptidase activity (GO:0004175)                              | 384             | 6           | 0.64     | 9.35       | 1.52E-02 |
| peptidase activity, acting on L-amino acid peptides (GO:0070011) | 537             | 8           | 0.9      | 8.91       | 1.51E-03 |
| peptidase activity (GO:0008233)                                  | 547             | 8           | 0.91     | 8.75       | 1.29E-03 |

**Supplementary Figure 1. Loss of Chk2 rescues germarial phenotypes in *ote* mutants.**

**A.** (Top, left) Schematic of a germarium with GSCs (red), differentiating germ cells (orange), niche cells (gray, dashed line) and somatic cells (gray). GSCs are distinguished by spectrosomes (green circles), whereas differentiating germ cells carry fusomes (branched green). Confocal images of germaria stained for Vasa (red) and Spectrin (green). Genotypes are noted at the top of each image. Dashed lines indicate position of the GSC niche. Scale bars represent 25  $\mu\text{m}$ . **B.** Quantification of the number of spectrosome-containing germ cells per germaria in less than one-day old females. Genotypes are noted below each bar and the number of germaria assessed from a minimum of five ovaries is noted above each bar. **C.** Left: Heatmap of the log<sub>2</sub> signal intensities of probe sets that significantly changed in NULL versus HET comparisons that were highlighted in the volcano plot in Fig. 2E; unsupervised clustering reveals no segregation by genotype. Right: Table of probesets with corresponding average intensity, fold change, statistics and gene name. **D.** PANTHER test results reveal over-representation of serine proteases among the genes up-regulated in *ote*<sup>-/-</sup> ovaries.

## Supplementary Figure 2

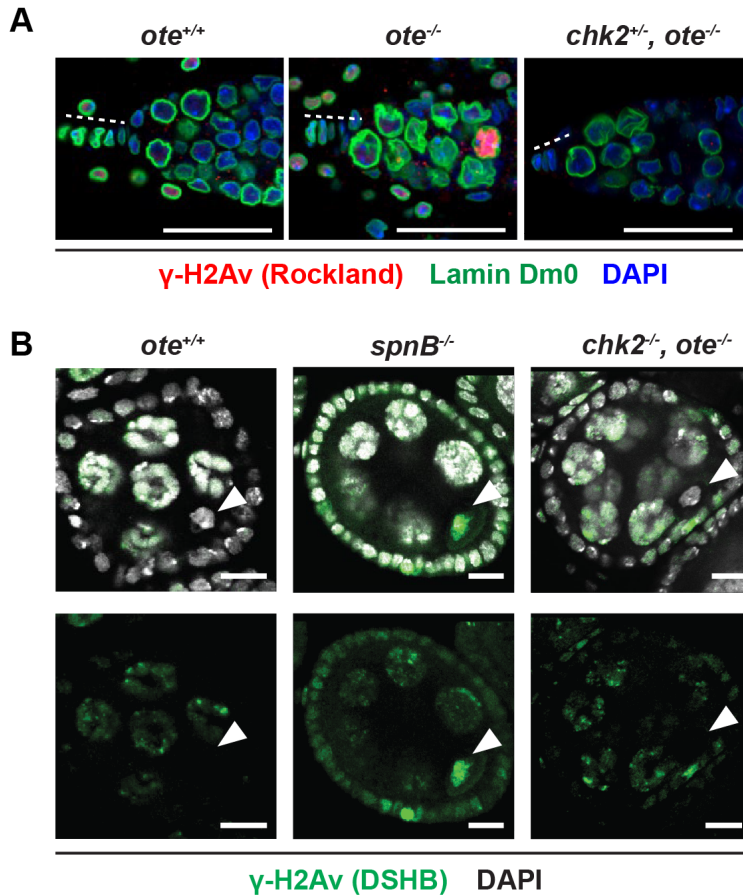

### Supplementary Figure 2. Analysis of DNA damage and repair in *ote* mutants.

**A.** Confocal images of germaria co-stained with antibodies against Lamin Dm0 (green) and a second antibody from Rockland that recognizes that DNA damage marker  $\gamma$ -H2Av (red, rabbit anti- $\gamma$ -H2Av, Rockland Bio), and DAPI (blue). Genotypes are noted at the top left of each image. The *chk2*<sup>+/-</sup> corresponds to *chk2*<sup>P6</sup> or *chk2*<sup>P30</sup> and *ote*<sup>-/-</sup> corresponds to *ote*<sup>B279G/PK</sup>. Scale bars represent 25  $\mu$ m. **B.** Confocal images of stage 5 egg chambers that carry 15 nurse cells and 1 posteriorly-positioned oocyte surrounded by a single layer of somatic cells. *Top*: egg chambers were stained with antibodies against  $\gamma$ -H2Av (DSHB, Green) and DAPI (blue). *Bottom*:  $\gamma$ -H2Av channel only. In *ote*<sup>+/+</sup> egg chambers, NC nuclei are polyploid due to multiple rounds of endoreduplicative replication cycles. As a result, these nuclei are large and carry

DSBs, evidenced by  $\gamma$ -H2Av staining. However, the meiotic DSBs of the oocyte nuclei are repaired in this stage egg chamber. In *spnB<sup>-/-</sup>* egg chambers, DSBs cannot be repaired. As a result,  $\gamma$ -H2Av staining is seen in somatic cells, NC and the oocyte nuclei. In *chk2, ote* double mutant egg chambers,  $\gamma$ -H2Av staining is seen in NCs, but absent in oocyte nuclei, evidence of normal DNA repair in this genetic background. Scale bars represent 10  $\mu$ m.

### Supplementary Figure 3

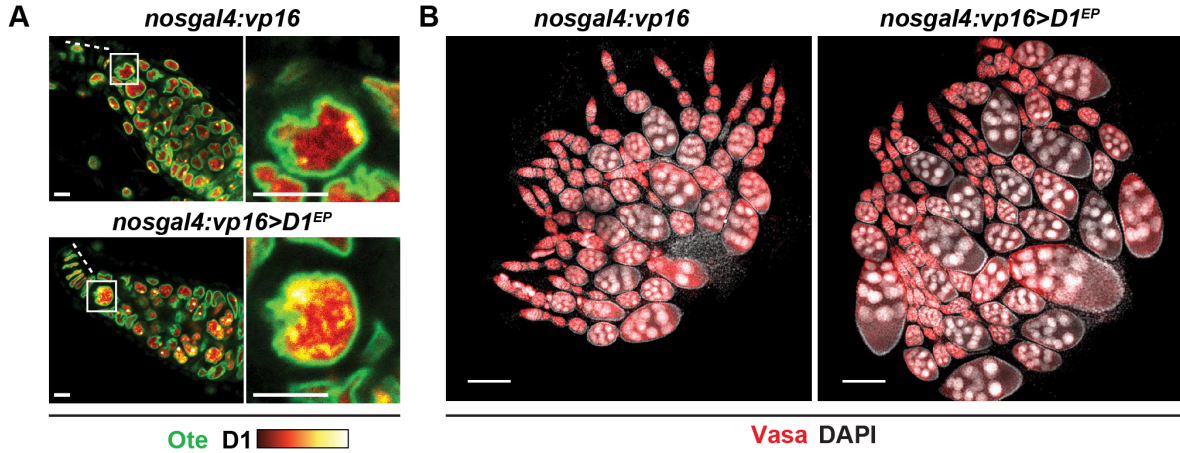

#### Supplementary Figure S3. Ectopic D1 production does not affect oogenesis.

**A.** Confocal image of germaria in *nosgal4:vp16* (driver only) or *nosgal4:vp16>D1<sup>EP473</sup>* (driver and responder) females. Germaria were stained for Ote (green) and D1 (red, heatmap to show intensity level), with an enlargement of a GSC nucleus shown in the right panel. Scale bars represent 5  $\mu\text{m}$ . **B.** Confocal images of ovaries dissected from less than one-day old females stained for Vasa (red) and DAPI (white). Genotypes are noted in the top of each image. Note that oogenesis is robust in females over-expressing D1. Scale bars represent 100  $\mu\text{m}$ .

#### Supplementary Figure 4

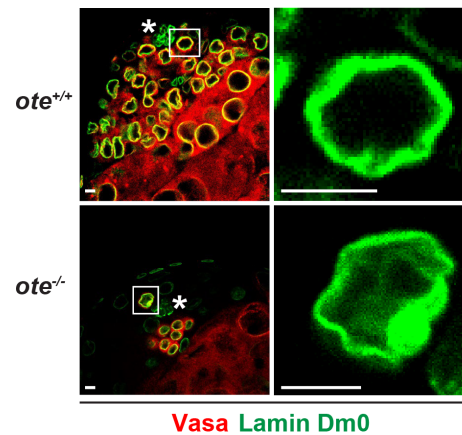

**Supplementary Figure 4. Loss of Ote alters the NL in male GSCs.** Confocal images of the testis stem cell niche (asterisk) in newly eclosed *ote*<sup>+/+</sup> (top) or *ote*<sup>-/-</sup> (bottom; *ote*<sup>B279G/PK</sup>) animals, alongside a GSC nucleus (boxed) that shows staining for Lamin Dm0 (green) and Vasa (red), revealing nuclear structural defects in mutant male GSCs. Scale bars represent 5  $\mu$ m.

**Supplementary Table 1: Alleles used in study**

| Gene                             | Genotype                                                                           | Nature of lesion                                        | Source                       |
|----------------------------------|------------------------------------------------------------------------------------|---------------------------------------------------------|------------------------------|
| <i>ATM</i><br>(telomere fusion)  | <i>w*;;tefu<sup>atm-6</sup>, e<sup>1</sup>/TM6B, Tb<sup>1</sup></i>                | EMS mutation,<br>W1315Stop                              | BL#8626 <sup>1</sup>         |
| <i>ATM</i><br>(telomere fusion)  | <i>tefu<sup>atm-8</sup>, e<sup>1</sup>/TM3, Sb<sup>1</sup></i>                     | EMS mutation, L2776F,<br>temperature sensitive          | BL#8624 <sup>1</sup>         |
| <i>ATR</i><br>(meiosis-41)       | <i>sn<sup>3</sup>, mei-41<sup>D9</sup>/C(1)DX, y<sup>1</sup>, f<sup>1</sup></i>    | EMS, deletion of first<br>163 amino acids               | BL#4174                      |
| <i>ATR</i><br>(meiosis-41)       | <i>y<sup>1</sup>, mei-41<sup>2</sup>/C(1)DX, y<sup>1</sup>, f<sup>1</sup></i>      | unknown                                                 | BL#4183 <sup>2</sup>         |
| <i>claspin</i><br>( <i>cla</i> ) | <i>yw; claspin<sup>279</sup>/ TM6B</i>                                             | C-terminal deletion of<br>88 amino acids, plus 25<br>AA | Molla-Herman<br><sub>3</sub> |
| <i>claspin</i><br>( <i>cla</i> ) | <i>yw, claspin<sup>aq4</sup></i>                                                   | C-terminal deletion of<br>270, plus 6 AA                | Molla-Herman<br><sub>3</sub> |
| <i>chk1</i><br>(grapes)          | <i>P(PZ) grp<sup>6034</sup>, cn<sup>1</sup>/CyO; ry<sup>506</sup></i>              | P insertion in first third<br>of gene                   | BL#12219                     |
| <i>chk1</i><br>(grapes)          | <i>w<sup>1118</sup>; PBac[RB]grp<sup>e00087</sup><br/>CG33552<sup>e00087</sup></i> | PB insertion in first fifth<br>of gene                  | BL#17813                     |
| <i>chk2</i><br>(loki, mnk)       | <i>y<sup>1</sup>w<sup>67c23</sup>; loki<sup>P6</sup>/CyO</i>                       | P insertion and deletion<br>in second exon              | Y. Rong <sup>4</sup>         |
| <i>chk2</i><br>(loki, mnk)       | <i>y<sup>1</sup>w<sup>67c23</sup>; loki<sup>P30</sup>/CyO</i>                      | Deletion of 5'UTR and<br>first two exons                | Y. Rong <sup>5</sup>         |
| <i>chk2</i><br>(loki, mnk)       | <i>chk2<sup>KD</sup></i>                                                           | Kinase-dead point<br>mutation: D286A                    | T. Xie <sup>6</sup>          |
| <i>D1</i>                        | <i>D1<sup>EP473</sup></i>                                                          | P{EP} insertion in the 5'<br>UTR of the gene            | <sub>7</sub>                 |
| <i>otefin</i><br>( <i>ote</i> )  | <i>y<sup>1</sup>w<sup>67c23</sup>; ote<sup>B279-G</sup>/CyO, y<sup>+</sup></i>     | PB insertion at +764                                    | BL#16189, Geyer lab          |
| <i>otefin</i><br>( <i>ote</i> )  | <i>y<sup>1</sup>w<sup>67c23</sup>; ote<sup>halPK</sup>/CyO, y<sup>+</sup></i>      | EMS mutation,<br>R127Stop                               | T. Schupbach <sup>8</sup>    |
| <i>p53</i>                       | <i>y<sup>1</sup>w<sup>1118</sup>; p53<sup>5A-1-4</sup></i>                         | Recombination, 3.3kb<br>deletion of gene                | BL#6815                      |
| <i>p53</i>                       | <i>y<sup>1</sup>w<sup>1118</sup>; p53<sup>11-1B-1</sup></i>                        | Recombination,<br>Q23Stop                               | BL#6816 <sup>9</sup>         |
| <i>bocksbeutel</i><br>(bocks)    | <i>y<sup>1</sup>w<sup>1118</sup>; bocks<sup>Δ10</sup></i>                          | 344 bp deletion from<br>+11                             | Geyer lab <sup>10</sup>      |
| <i>bocksbeutel</i><br>(bocks)    | <i>y<sup>1</sup>w<sup>1118</sup>; bocks<sup>Δ66</sup></i>                          | 728 bp deletion from<br>+11                             | Geyer lab <sup>10</sup>      |



**Supplementary Table 2: Primary antibodies**

| Protein                        | Source                           | Species    | Dilution                |
|--------------------------------|----------------------------------|------------|-------------------------|
| $\gamma$ -H2Av                 | DSHB (UNC93-5.2.1) <sup>11</sup> | Mouse      | IFA 1:500               |
| $\gamma$ -H2AX/ $\gamma$ -H2Av | Rockland                         | Rabbit     | IFA 1:500               |
| D1                             | Yokiko Yamashita                 | Guinea pig | IFA 1:250               |
| H3K9me3                        | Millipore (07-442)               | Rabbit     | IFA 1:100               |
| HipHop                         | Y. Rong <sup>12</sup>            | Guinea pig | IFA 1:100               |
| HOAP                           | Y. Rong <sup>12</sup>            | Guinea pig | IFA 1:100               |
| HP1a                           | Covance (PRB291C)                | Rabbit     | IFA 1:500               |
| lamin Dm <sub>0</sub>          | DSHB (ADL84.12)                  | Mouse      | IFA 1:200               |
| H3 S10ph                       | Millipore (06-570)               | Mouse      | IFA 1:200               |
| Spectrin                       | DSHB (3A9)                       | Mouse      | IFA 1:50                |
| Vasa                           | Santa Cruz (sc-30210)            | Rabbit     | IFA 1:1,000, WB 1:5,000 |
| Vasa                           | Santa Cruz (26877)               | Goat       | IFA 1:300               |
| Engrailed                      | DSHB (4D9)                       | Mouse      | IFA 1:50                |
| Lamin C                        | DSHB (LC28.26)                   | Mouse      | IFA 1:200               |
| Lamin Dm0                      | Paul Fischer (R836)              | Rabbit     | IFA 1:200               |
| Lamin Dm0                      | DSHB (AD:84.12)                  | Mouse      | IFA 1:200               |

**Supplementary Table 3: Primers used for animal genotyping**

| Allele                        | Forward Primer              | Reverse Primer                        |
|-------------------------------|-----------------------------|---------------------------------------|
| <i>chk2</i> <sup>P30</sup>    | CTTGCTCACCTTGTTGCCATT       | CAAAGGCTACAAGGGAGGGCA                 |
| <i>grp</i> <sup>6034</sup>    | TGCTGAACCTTGAGCGAGAGAGCAA   | ACGAGCCACACAGATACACACCAA              |
| <i>ote</i> <sup>B279G</sup>   | ATGGCCGATGTGGACGATTTTGATTC  | CGACGGGACCACCTTATGTTATTTCA            |
| <i>ote</i> <sup>Pk</sup>      | GGATCCATGGCCGATGTGGAC       | GGATCCTCAGTAGAATATGTAATAAACGCCGATTAAC |
| <i>p53</i> <sup>11-1b-1</sup> | GTTTCGCCTGGATCTTAATTA       | AATCGCTGCATGCGGTAGTA                  |
| <i>p53</i> <sup>5A-1-4</sup>  | AGCTAATGTGACTTCGCATTGAACAAA | TCGATAAACATTGGCTACGGCGATTGT           |
| <i>bocks</i>                  | GGCGCCTTCTCGCTCTTGTC        | TTCCCGAGATCGAGGTGTTGTCTA              |
| <i>cla</i>                    | GCCTTACAACACTGCCTGCATCAG    | GTGCCTCCTGGATCACGGCGAC                |

**Supplementary Table 4: Primers used to measure RNAs**

| Gene           | Forward Primer            | Reverse Primer             |
|----------------|---------------------------|----------------------------|
| <i>blood</i>   | TGCCACAGTACCTGATTTTCG     | GATTCGCCTTTTACGTTTGC       |
| <i>burdock</i> | CGGTAAAATCGCTTCATGGT      | ACGTTGCATTTCCCTGTTTC       |
| <i>divr 2</i>  | CTTCAGCCAGCAAGGAAAAC      | CTGGCAGTCGGGTGTAATTT       |
| <i>divr1</i>   | GGCACCACATAGACACATCG      | GTGGTTTGCATAGCCAGGAT       |
| <i>GAPDH</i>   | CACTCGTCGGTGTTCGATGCCAAG  | TCGATGACGCGTTGGAGTAGC      |
| <i>gypsy6</i>  | GACAAGGCATAACCGATACTGTGGA | AATGATTCTGTTCCGGACTTCCGTCT |
| <i>Het-A</i>   | CGCGCGGAACCCATCTTCAGA     | CGCCGCAGTCGTTTGGTGAGT      |
| <i>inv1</i>    | GTACCGTTTTTGAGCCCGTA      | AACTACGTTGCCATTCTGG        |
| <i>roo</i>     | CCTCTGCGTAGGCCATTTAC      | AAGGCTCGATTGACCAAATG       |
| <i>RpL32</i>   | AAGATGACCATCCGCCAGCATAC   | ACGCACTCTGTTGTCGATACCCTTG  |
| <i>TART</i>    | GCCTGGGCGTATTAGTCAGATA    | ACTTATGAGACGCTCTGTTG       |
| <i>vasa</i>    | CATGAACTGGAGCTTGAAGA      | AGGTGCCTCCGTAACAATAC       |

## Supplementary References

- 1 Silva, E. *et al.* ATM is required for telomere maintenance and chromosome stability during *Drosophila* development. *Curr Biol* **14**, 1341-1347, doi:10.1016/j.cub.2004.06.056 (2004).
- 2 Gatti, M. Genetic control of chromosome breakage and rejoining in *Drosophila melanogaster*: spontaneous chromosome aberrations in X-linked mutants defective in DNA metabolism. *Proc Natl Acad Sci U S A* **76**, 1377-1381 (1979).
- 3 Lee, E. M. *et al.* *Drosophila* Claspin is required for the G2 arrest that is induced by DNA replication stress but not by DNA double-strand breaks. *DNA Repair (Amst)* **11**, 741-752, doi:10.1016/j.dnarep.2012.06.007 (2012).
- 4 Abdu, U., Brodsky, M. & Schupbach, T. Activation of a meiotic checkpoint during *Drosophila* oogenesis regulates the translation of Gurken through Chk2/Mnk. *Curr Biol* **12**, 1645-1651 (2002).
- 5 LaRocque, J. R., Jaklevic, B., Su, T. T. & Sekelsky, J. *Drosophila* ATR in double-strand break repair. *Genetics* **175**, 1023-1033, doi:10.1534/genetics.106.067330 (2007).
- 6 Ma, X. *et al.* DNA damage-induced CHK2 activation compromises germline stem cell self-renewal and lineage differentiation. *Development* **143**, 4312-4323, doi:10.1242/dev.141069 (2016).
- 7 Smith, M. B. & Weiler, K. S. *Drosophila* D1 overexpression induces ectopic pairing of polytene chromosomes and is deleterious to development. *Chromosoma* **119**, 287-309, doi:10.1007/s00412-010-0257-x (2010).
- 8 Barton, L. J., Pinto, B. S., Wallrath, L. L. & Geyer, P. K. The *Drosophila* nuclear lamina protein otefin is required for germline stem cell survival. *Dev Cell* **25**, 645-654, doi:S1534-5807(13)00317-1 [pii] 10.1016/j.devcel.2013.05.023 (2013).
- 9 Rong, Y. S. *et al.* Targeted mutagenesis by homologous recombination in *D. melanogaster*. *Genes Dev* **16**, 1568-1581, doi:10.1101/gad.986602 (2002).
- 10 Barton, L. J. *et al.* Unique and Shared Functions of Nuclear Lamina LEM Domain Proteins in *Drosophila*. *Genetics* **197**, 653-665, doi:10.1534/genetics.114.162941 (2014).
- 11 Lake, C. M., Holsclaw, J. K., Bellendir, S. P., Sekelsky, J. & Hawley, R. S. The development of a monoclonal antibody recognizing the *Drosophila melanogaster* phosphorylated histone H2A variant (gamma-H2AV). *G3* **3**, 1539-1543, doi:10.1534/g3.113.006833 (2013).
- 12 Gao, G. *et al.* HipHop interacts with HOAP and HP1 to protect *Drosophila* telomeres in a sequence-independent manner. *EMBO J* **29**, 819-829, doi:emboj2009394 [pii] 10.1038/emboj.2009.394 (2010).
